# Supplementary material for: Soil microbial restoration strategies for promoting climate‐ready prairie ecosystems
Source: PubMed Central journal article supplement (PMC9286448; doi:10.1002/eap.1858), 2019-03-04
Supplement: EAP-29-e01858-s002.pdf [file EAP-29-e01858-s002.pdf]

**Docherty, K. M. and J. L. M. Gutknecht. 2019. Soil microbial restoration strategies for promoting climate-ready prairie ecosystems. *Ecological Applications*.**

---

## **Data S2**

### **Proportion Relative Abundance of All Identified Lipids**

---

#### **Authors**

Kathryn M. Docherty  
Western Michigan University  
Department of Biological Sciences  
1903 West Michigan Ave., Mailstop 5410, Kalamazoo, MI 49008  
kathryn.docherty@wmich.edu

Jessica L.M. Gutknecht  
University of Minnesota, Twin Cities  
Department of Soil, Water and Climate  
439 Borlaug Hall, 1991 Upper Buford Circle, St. Paul, MN 55108  
jgut@wmich.edu

---

#### **File list (file found within DataS2.zip)**

DataS2.csv

#### **Description**

DataS2.csv contains the relative abundances of all lipids identified using PLFA for this manuscript. The file includes columns for: pot ID number, the plant species treatment classification (1 or 3), the room temperature classification (ambient or elevated), the soil amendment treatment (control, inoculate or cellulose) and the relative abundances of lipids 12:0\_RA, 14:0\_RA, 15:0 anteiso\_RA, 15:0 iso\_RA, 16:0\_RA, 16:0 10 me\_RA, 16:1 w5c\_RA, 16:1 w7c\_RA, 16:1 w9c\_RA, 17:0 anteiso\_RA, 17:0 cyclo\_RA, 17:0 iso\_RA, 18:0\_RA, 18:1 w9c\_RA, 18:1 w9t\_RA, 18:2 w6,9c\_RA, 19:0\_RA, 19:0 cyclo\_RA.

---
